# Supplementary material for: Vitamin B6 Levels and Impaired Folate Status but Not Vitamin B12 Associated with Low Birth Weight: Results from the MAASTHI Birth Cohort in South India
Source: MDPI journal article supplement (doi:10.3390/nu15071793), 2023-04-06
Supplement: s1 [file s1]

**Supplementary Table S1. Associations between the Impaired folate status with the prevalence of low birth weight**

|                               | <b>Causal Model with IPTW</b> |            |              |
|-------------------------------|-------------------------------|------------|--------------|
|                               | OR                            | 95% CI     | p            |
| <b>Impaired folate status</b> | 1.95                          | 1.29, 3.07 | <b>0.002</b> |

Adjusted for maternal age, parity, maternal adiposity, gestational diabetes mellitus, BMI, socioeconomic status, and sex of the child
